# Supplementary material
Source: ML conference proceedings conference paper supplement (https://www.ecva.net/papers/eccv_2020/papers_ECCV/html/123710239_ECCV_2020_paper.php)
Supplement: Supplementary file 1 [file 123710239-supp.pdf]

# Deformable Style Transfer: Supplementary Material

## Implementation Details

To produce DST results with **Gatys**, we initialized the output image as the content image resized to have a long side of 256 pixels. During the optimization, we updated the parameters 100 times with a learning rate of 1 with L-BFGS, following the authors’ implementation settings. Since the content and style loss terms and the deformation loss term have vastly different magnitudes, we scaled down the content loss and the style loss by  $1/50000$  and  $1/100000$ , respectively. We also scaled down the deformation parameter gradients by  $1/1000000$  to update them at a much smaller rate.

To produce DST results with **STROTSS**, we followed the authors’ implementation settings and optimized the output image at multiple scales, starting from a low-resolution image scaled to have a long side of 64 pixels. The output image was initialized as the bottom level of a Laplacian pyramid of the content image added to the mean color of the style image. During the optimization, instead of optimizing the pixels directly, we optimized the Laplacian pyramid of the image for faster convergence, in addition to the deformation parameters  $\theta$ . At each scale, we used the output of the previous scale as the initial image, used bilinear upsampling to increase the resolution, and halved the content weight  $\alpha$  that controls the relative importance of content preservation to stylization. We produced the stylized images in the main paper at three scales, starting from content weight  $\alpha = 32$ . At each scale, we made 350 updates of the parameters using stochastic gradient descent with a learning rate of 0.2. More details can be found in our published code: <https://github.com/sunniesuhyoung/DST>.

## Human Evaluation

As described in Section 5.2 of the main paper, we conducted a human evaluation study using Amazon Mechanical Turk on a set of 75 diverse style/content pairs. We show the evaluation interfaces in Supplementary Figures 1 and 2.

## Image Credits

### Figure 1

1. Schoeller, Martin: ‘Meryl Streep’. (2018), <http://www.artnet.com/artists/martin-schoeller/meryl-streep-from-the-series-portraits-a-iuZXKIjNqXY2M9v6ih-p1A2>

How would you respond to the following statement?

"Image A represents the same scene as Image B"

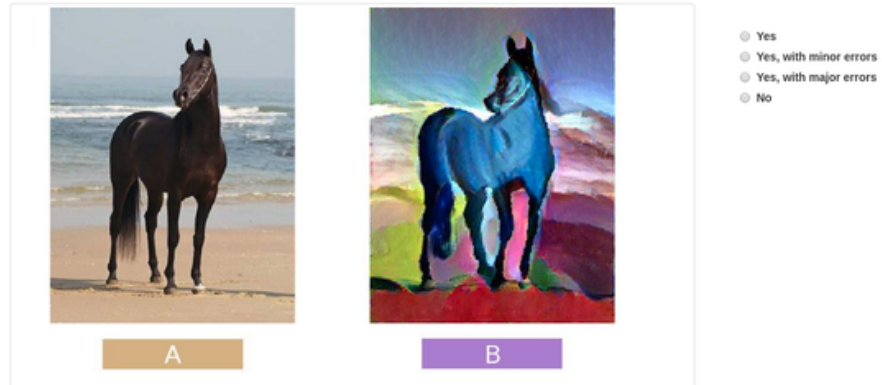

Supplementary Fig. 1: Evaluation interface for measuring content preservation.

Which of Image A or Image B better matches the style of the reference?

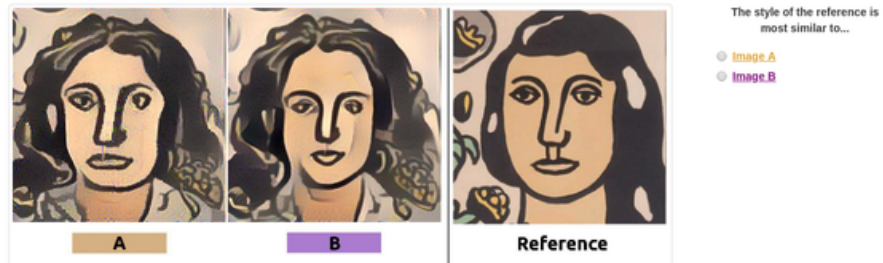

Supplementary Fig. 2: Evaluation interface for measuring stylization.

2. Matisse, Henri: ‘Girl with a Black Cat’. (1910), <https://www.wikiart.org/en/henri-matisse/girl-with-a-black-cat>
3. Spellman, Jim: ‘Jennifer Lawrence Photo’. (2015), <https://www.gettyimages.com/detail/news-photo/actress-jennifer-lawrence-attends-the-the-hunger-games-news-photo/497773150>
4. Snow, Rob: ‘Gillian Anderson Caricature’. <https://www.juniqe.com/gillian-anderson-premium-poster-portrait-990829.html>
5. Bernard, Jean: ‘Standing Bull Painting’. (c. 1775-1883), <https://www.rawpixel.com/image/481523/free-illustration-image-bull-painting-animal>
6. Picasso, Pablo: ‘Bull’. (1945), [https://www.artfactory.com/art\\_appreciation/animals\\_in\\_art/pablo\\_picasso.htm](https://www.artfactory.com/art_appreciation/animals_in_art/pablo_picasso.htm)
7. Turk, Greg. Levoy, Marc: ‘Stanford Bunny Render’. (1994), [https://en.wikipedia.org/wiki/Stanford\\_bunny](https://en.wikipedia.org/wiki/Stanford_bunny)
8. Walter, Sonia: ‘Bunny Painting’. <https://www.etsy.com/sg-en/listing/533084025/bunny-painting-rabbit-painting-childrens>
9. Original artist unknown: ‘Photo of Man with Shaven Head’. <http://www.faculty.idc.ac.il/arik/site/foa/face-of-art.asp>
10. Leger, Fernand: ‘La Botte de Navets’. (1951), <https://www.flickr.com/photos/32215553@N02/4586893382>

### Figure 2

1. Original artist unknown: ‘Ray Kurzweil Photo’, <https://www.raadfest.com/ray-kurzweil>
2. Meckenem, Israhel van: ‘Double Portrait of Israhel van Meckenem and His Wife Ida’. (1490), <https://www.nga.gov/collection/art-object-page.3311.html>
3. Original artist unknown: ‘Photo of Man in Suit’, Unknown Source
4. Van Gogh, Vincent: ‘Self-Portrait’. (1889), <https://www.nga.gov/collection/art-object-page.106382.html>
5. Original artist unknown: ‘Closeup Photo of Blond Woman’, <https://cgm.technion.ac.il/Computer-Graphics-Multimedia/Software/Contextual/resources/comparison/index.html>
6. Kisling, Moise: ‘Unidentified Portrait’, <https://www.wikiart.org/en/moise-kisling/not-identified-9/>
7. Original artist unknown: ‘Pig Photo’, <https://foodsafetynewsfullservice.marlersites.com/files/2016/04/pig-big-ears-406.jpg>
8. Original artist unknown: ‘Poppy the Pig’, <https://social-artworking.com/poppy-the-pig>

### Figure 3

1. Original artist unknown: ‘Truck Photo’. [https://marvel-b1-cdn.bc0a.com/f00000000067090/www.constructionequipment.com/sites/ce/files/styles/large/public/X11GM\\_SH051%5B1%5D.jpg](https://marvel-b1-cdn.bc0a.com/f00000000067090/www.constructionequipment.com/sites/ce/files/styles/large/public/X11GM_SH051%5B1%5D.jpg)
2. Galaich, George: ‘Distorted Truck’. <https://pixels.com/featured/distorted-truck-george-galaich.html>

#### Figure 4

1. Original artist unknown: ‘Closeup Photo of Woman with Dark Hair’.  
<https://cgm.technion.ac.il/Computer-Graphics-Multimedia/Software/Contextual/resources/comparison/index.html>
2. Picasso, Pablo: ‘Nude Woman With Necklace’. (1968), <https://www.tate.org.uk/art/artworks/picasso-nude-woman-with-necklace-t03670>

#### Figure 5

1. Original artist unknown: ‘Ray Kurzweil Photo’, <https://www.raadfest.com/ray-kurzweil>
2. Van Gogh, Vincent: ‘The Zouave’. (June 1888),  
<https://www.vangoghmuseum.nl/en/collection/s0067V1962>
3. Original artist unknown: ‘Husky Puppy Photo’, Unknown source
4. Hannson, Stefan: ‘Husky Caricature’. (2017), <https://www.artstation.com/artwork/ry8dm>
5. Original artist unknown: ‘Photo of Woman with Wavy Hair’.  
<http://www.faculty.idc.ac.il/arik/site/foa/face-of-art.asp>
6. Modigliani, Amedeo: ‘Girl with a Polka-Dot Blouse’. (1919),  
[https://collection.barnesfoundation.org/objects/5538/Girl-with-a-Polka-Dot-Blouse-\(Jeune-fille-au-corsage-a-pois\)/](https://collection.barnesfoundation.org/objects/5538/Girl-with-a-Polka-Dot-Blouse-(Jeune-fille-au-corsage-a-pois)/)
7. Original artist unknown: ‘Running Shoes Photo’. <http://www.stockphotos.ro/running-shoes-gym-floor-after-workout-image12693027.html>
8. Van Gogh, Vincent: ‘Shoes’. (1888), <https://www.metmuseum.org/art/collection/search/436533>

#### Figure 6

1. Original artist unknown: ‘Peasant Woman Carrying A Pack On Her Back’.  
<https://www.davidsongalleries.com/sections/modern/french-prints/additional-available-works/peasant-woman-carrying-a-pack-on-her-back/>
2. Rivera, Diego: ‘Peasant Woman’. (1946), [https://i2.wp.com/blog.dma.org/wp-content/uploads/2017/02/1985\\_16\\_w.jpg](https://i2.wp.com/blog.dma.org/wp-content/uploads/2017/02/1985_16_w.jpg)
3. Original artist unknown: ‘Truck Photo’.  
[https://marvel-b1-cdn.bc0a.com/f00000000067090/www.constructionequipment.com/sites/ce/files/styles/large/public/X11GM\\_SH051%5B1%5D.jpg](https://marvel-b1-cdn.bc0a.com/f00000000067090/www.constructionequipment.com/sites/ce/files/styles/large/public/X11GM_SH051%5B1%5D.jpg)
4. Galaich, George: ‘Distorted Truck’. <https://pixels.com/featured/distorted-truck-george-galaich.html>
5. Storm, Derek: ‘Ezra Miller Photo’. (2016), <https://www.alamy.com/stock-photo-new-york-ny-usa-10th-nov-2016-ezra-miller-at-arrivals-for-fantastic-125688242.html>
6. Snow, Rob: ‘Benedict Cumberbatch Caricature’.  
[https://cargocollective.com/robsnow\\_creative/Caricatures/filter/human/Celebrity-Sunday-Benedict-Cumberbatch](https://cargocollective.com/robsnow_creative/Caricatures/filter/human/Celebrity-Sunday-Benedict-Cumberbatch)
7. Original artist unknown: ‘Horse Photo’.  
<https://twitter.com/Bbelisle7/status/1215411108921724929/photo/1>
8. Sierra, Dania: ‘Grey Mane’. <https://www.saatchiart.com/art/Painting-Grey-Mane/561637/6472363/view>

**Figure 7**

1. Original artist unknown: ‘Photo of Woman with Wavy Hair’.  
<http://www.faculty.idc.ac.il/arik/site/foa/face-of-art.asp>
2. Leger, Fernand: ‘La Femme et la fleur’. (1954), <https://www.artsy.net/artwork/fernand-leger-la-femme-et-la-fleur>
3. Original artist unknown: ‘Photo of Woman with Pulled Back Hair’.  
<http://www.faculty.idc.ac.il/arik/site/foa/face-of-art.asp>
4. Modigliani, Amedeo: ‘Gypsy Woman with Baby’. (1919), <https://www.nga.gov/collection/art-object-page.46649.html>
5. Original artist unknown: ‘Photo of Man with Short Hair’.  
<http://www.faculty.idc.ac.il/arik/site/foa/face-of-art.asp>
6. Leger, Fernand: ‘Male Portrait’, <http://www.faculty.idc.ac.il/arik/site/foa/face-of-art.asp>
7. Original artist unknown: ‘Photo of Hilary Swank’, <https://cs.nju.edu.cn/rl/WebCaricature.htm>
8. Original artist unknown: ‘Caricature of Hilary Swank’, <https://cs.nju.edu.cn/rl/WebCaricature.htm>
9. Original artist unknown: ‘Photo of Rowan Atkinson’, <https://cs.nju.edu.cn/rl/WebCaricature.htm>
10. Original artist unknown: ‘Photo of Rowan Atkinson’, <https://cs.nju.edu.cn/rl/WebCaricature.htm>
11. Original artist unknown: ‘Photo of Cate Blanchett’, <https://cs.nju.edu.cn/rl/WebCaricature.htm>
12. Original artist unknown: ‘Caricature of Cate Blanchett’, <https://cs.nju.edu.cn/rl/WebCaricature.htm>

**Figure 9**

1. Original artist unknown: ‘Photo of Barred Owls’.  
[https://1.bp.blogspot.com/-1weEwEzz2wk/Xb64zZC-2RI/AAAAAAAAADI-M/pTeSYN7v\\_KAo2YK3FSPUt6SVe76A5pYaQCLcBGAsYHQ/s640/88l.jpg](https://1.bp.blogspot.com/-1weEwEzz2wk/Xb64zZC-2RI/AAAAAAAAADI-M/pTeSYN7v_KAo2YK3FSPUt6SVe76A5pYaQCLcBGAsYHQ/s640/88l.jpg)
2. Yun, Sungsil: ‘Korean Traditional Watercolor Owl’. <https://www.saatchiart.com/art/Painting-Korean-traditional-watercolor-owl/1143968/4610489/view>
3. Original artist unknown: ‘Surprised Boy Photo’.  
<http://weknowyourdreams.com/single/surprise/surprise-01>
4. Original artist unknown: ‘Maya the Bee Render’. <https://www.independent.co.uk/arts-entertainment/tv/news/netflix-penis-cartoon-penis-episode-maya-the-bee-a7958551.html>
5. Original artist unknown: ‘Husky Photo’. Unknown Source
6. Original artist unknown: ‘Dog Caricature’. Unknown Source

**Supplementary Figure 1**

1. Original artist unknown: ‘Black Horse Photo’. Unknown Source
2. Marc, Franz: ‘Blue Horse’. (1911), <http://www.franzmarc.com/blue-horse/>

**Supplementary Figure 2**

1. Original artist unknown: ‘Photo of Woman with Wavy Hair’.  
<http://www.faculty.idc.ac.il/arik/site/foa/face-of-art.asp>
2. Leger, Fernand: ‘La Femme et la fleur’. (1954), <https://www.artsy.net/artwork/fernand-leger-la-femme-et-la-fleur>
